# Supplementary material for: Dissecting the role of low-complexity regions in the evolution of vertebrate proteins
Source: PubMed Central journal article supplement (PMC3523016; doi:10.1186/1471-2148-12-155), 2012-08-24
Supplement: 1471-2148-12-155-S2.pdf [file 1471-2148-12-155-S2.pdf]

Radó-Trilla and Albà (2012), additional data file 2.

**Table 1**

| Level of codon similarity | Amino acid pairs   |
|---------------------------|--------------------|
| High similarity           | ED, AG, KE, AP, RG |
| Intermediate similarity   | QP, SR, SG, LP     |
| No similarity             | PG, ER, SE         |

**Table 1. Classification of amino acid pairs based on codon similarity.** High similarity is when one point mutation in any of the codons of the first amino acid can result in a codon for the second amino acid. Intermediate similarity is when one point mutation can lead to the second amino acid for only some of the codons. No similarity is when one point mutation is not sufficient to go from the first amino acid to the second amino acid.

**Table 2**

| <b>Branch</b> | <b>LCRs (obs)</b> | <b>Mya</b> | <b>LCRs(obs)/Mya</b> | <b>LCRs (exp)</b> | <b>p-value</b>         |
|---------------|-------------------|------------|----------------------|-------------------|------------------------|
| amniota       | 138               | 104        | 1.33                 | 43                | $1.19 \times 10^{-14}$ |
| mammals       | 133               | 251        | 0.53                 | 104               | 0.0451                 |
| human         | 32                | 61.5       | 0.52                 | 26                | 0.4988                 |
| mouse         | 35                | 61.5       | 0.57                 | 26                | 0.2906                 |
| chicken       | 38                | 312        | 0.12                 | 130               | $1.43 \times 10^{-14}$ |
| zebrafish     | 126               | 416        | 0.3                  | 173               | 0.0015                 |

**Table 2. LCRs gained in different branches of the vertebrate phylogeny.** Mya: estimated length of the branch in million years (Mya), see text for more details. p-value is from a test of equal proportions between LCRs observed (obs) and LCRs expected (exp) given branch lengths. Differences between LCRs observed and LCRs expected were significant by a chi-square test ( $p < 10^{-5}$ ).

**Table 3****Observed**

|        | Chordata | Vertebrata | Amniota | Mammals | Human | Mouse | Chicken | Zebrafish | Ciona | Total |
|--------|----------|------------|---------|---------|-------|-------|---------|-----------|-------|-------|
| E      | 32       | 52         | 19      | 12      | 3     | 3     | 3       | 23        | 2     | 149   |
| S      | 23       | 47         | 6       | 9       | 2     | 1     | 2       | 25        | 7     | 122   |
| G      | 18       | 22         | 17      | 19      | 6     | 6     | 1       | 14        | 3     | 106   |
| P      | 23       | 24         | 17      | 12      | 2     | 1     | 2       | 6         | 0     | 87    |
| A      | 5        | 10         | 15      | 26      | 7     | 6     | 12      | 8         | 1     | 90    |
| Q      | 11       | 19         | 11      | 7       | 2     | 5     | 1       | 7         | 11    | 74    |
| K      | 29       | 16         | 1       | 0       | 0     | 0     | 1       | 3         | 6     | 56    |
| D      | 8        | 6          | 0       | 0       | 0     | 1     | 1       | 2         | 1     | 19    |
| R      | 12       | 7          | 0       | 0       | 0     | 0     | 0       | 1         | 0     | 20    |
| ED     | 16       | 17         | 3       | 0       | 0     | 1     | 0       | 1         | 1     | 39    |
| SR     | 16       | 10         | 1       | 0       | 0     | 0     | 0       | 1         | 1     | 29    |
| AG     | 1        | 7          | 6       | 4       | 1     | 1     | 3       | 0         | 0     | 23    |
| PG     | 3        | 11         | 3       | 3       | 1     | 0     | 2       | 0         | 1     | 23    |
| RG     | 7        | 6          | 0       | 0       | 0     | 0     | 3       | 3         | 2     | 20    |
| AP     | 2        | 3          | 2       | 3       | 1     | 1     | 3       | 2         | 0     | 16    |
| SG     | 0        | 4          | 1       | 3       | 2     | 0     | 0       | 2         | 0     | 12    |
| ER     | 3        | 8          | 0       | 0       | 0     | 0     | 0       | 0         | 2     | 13    |
| LP     | 0        | 1          | 1       | 4       | 0     | 0     | 0       | 0         | 0     | 6     |
| SE     | 3        | 1          | 0       | 0       | 0     | 0     | 0       | 1         | 0     | 5     |
| QP     | 0        | 6          | 8       | 5       | 0     | 1     | 0       | 0         | 0     | 20    |
| others | 46       | 67         | 27      | 26      | 5     | 8     | 7       | 27        | 16    | 167   |
| Total  | 258      | 344        | 138     | 133     | 32    | 35    | 38      | 126       | 54    | 1096  |

**Expected**

|    | Chordata | Vertebrata | Amniota | Mammals | Human | Mouse | Chicken | Zebrafish | Ciona |
|----|----------|------------|---------|---------|-------|-------|---------|-----------|-------|
| E  | 35       | 47         | 19      | 18      | 4     | 5     | 5       | 17        | 7     |
| S  | 29       | 38         | 15      | 15      | 4     | 4     | 4       | 14        | 6     |
| G  | 25       | 33         | 13      | 13      | 3     | 3     | 4       | 12        | 5     |
| P  | 20       | 27         | 11      | 11      | 3     | 3     | 3       | 10        | 4     |
| A  | 21       | 28         | 11      | 11      | 3     | 3     | 3       | 10        | 4     |
| Q  | 17       | 23         | 9       | 9       | 2     | 2     | 3       | 9         | 4     |
| K  | 13       | 18         | 7       | 7       | 2     | 2     | 2       | 6         | 3     |
| D  | 4        | 6          | 2       | 2       | 1     | 1     | 1       | 2         | 1     |
| R  | 5        | 6          | 3       | 2       | 1     | 1     | 1       | 2         | 1     |
| ED | 9        | 12         | 5       | 5       | 1     | 1     | 1       | 4         | 2     |
| SR | 7        | 9          | 4       | 4       | 1     | 1     | 1       | 3         | 1     |
| AG | 5        | 7          | 3       | 3       | 1     | 1     | 1       | 3         | 1     |
| PG | 5        | 7          | 3       | 3       | 1     | 1     | 1       | 3         | 1     |
| RG | 5        | 6          | 3       | 2       | 1     | 1     | 1       | 2         | 1     |

|        |     |     |     |     |    |    |    |     |    |
|--------|-----|-----|-----|-----|----|----|----|-----|----|
| AP     | 4   | 5   | 2   | 2   | 0  | 1  | 1  | 2   | 1  |
| SG     | 3   | 4   | 2   | 1   | 0  | 0  | 0  | 1   | 1  |
| ER     | 3   | 4   | 2   | 2   | 0  | 0  | 0  | 1   | 1  |
| LP     | 1   | 2   | 1   | 1   | 0  | 0  | 0  | 1   | 0  |
| SE     | 1   | 2   | 1   | 1   | 0  | 0  | 0  | 1   | 0  |
| QP     | 5   | 6   | 3   | 2   | 1  | 1  | 1  | 2   | 1  |
| others | 39  | 52  | 21  | 20  | 5  | 5  | 6  | 19  | 8  |
| Total  | 258 | 344 | 138 | 133 | 32 | 35 | 38 | 126 | 54 |

**Table 3. Observed and expected frequencies of different LCR types conserved at different phylogenetic depths.** The data corresponds to Figure 2 in main manuscript file.

**Table 4**

| A,G,AG            | Chordata | Vertebrata | Amniota | Mammals | Human |
|-------------------|----------|------------|---------|---------|-------|
| observed          | 24       | 39         | 38      | 49      | 14    |
| expected          | 47       | 62         | 25      | 24      | 6     |
| observed/expected | 0,51     | 0,63       | 1,52    | 2,03    | 2,41  |

| A,G,AG            | Chordata | Vertebrata | Amniota | Chicken |
|-------------------|----------|------------|---------|---------|
| observed          | 24       | 39         | 38      | 16      |
| expected          | 39       | 52         | 21      | 6       |
| observed/expected | 0,62     | 0,75       | 1,83    | 2,8     |

| A,G,AG            | Chordata | Vertebrata | Zebrafish |
|-------------------|----------|------------|-----------|
| observed          | 24       | 39         | 22        |
| expected          | 30       | 40         | 15        |
| observed/expected | 0,8      | 0,97       | 1,5       |

| K,R               | Chordata | Vertebrata | Amniota | Mammals | Human |
|-------------------|----------|------------|---------|---------|-------|
| observed          | 41       | 23         | 1       | 0       | 0     |
| expected          | 19       | 25         | 10      | 10      | 2     |
| observed/expected | 2,21     | 0,93       | 0,1     | 0       | 0     |

| K,R               | Chordata | Vertebrata | Amniota | Chicken |
|-------------------|----------|------------|---------|---------|
| observed          | 41       | 23         | 1       | 1       |
| expected          | 22       | 29         | 12      | 3       |
| observed/expected | 1,87     | 0,79       | 0,09    | 0,31    |

| K,R               | Chordata | Vertebrata | Zebrafish |
|-------------------|----------|------------|-----------|
| observed          | 41       | 23         | 22        |
| expected          | 24       | 32         | 12        |
| observed/expected | 1,7      | 0,72       | 0,34      |

**Table 4. Observed and expected frequencies of different types of LCRs conserved at different phylogenetic depths.** The data corresponds to Figure 3 in main manuscript file.

**Table 5**

|           | Loss rate (loss/total) | % LCRs loss by gain of<br>sequence complexity |
|-----------|------------------------|-----------------------------------------------|
| Human     | 0.104 (17/164)         | 83.3 %                                        |
| Mouse     | 0.145 (25/172)         | 71.4 %                                        |
| Mammal    | 0.155 (34/134)         | 68.1 %                                        |
| Chicken   | 0.254 (9/38)           | 70.8 %                                        |
| Amniota   | 0.233 (7/30)           | 89.5 %                                        |
| Zebrafish | 0.237 (16/103)         | 73.9 %                                        |

**Table 5. Rate of LCR loss in different branches.** % Increase in complexity: percentage of cases of LCR loss due to increase in sequence complexity (beyond recognition of the LCR by SEG, gaps in the LCR aligned region < 50%) and not to LCR deletion.

**Table 6**

|          | Observed in proteins |        |         |           |        | Observed in LCRs |        |         |           |        |
|----------|----------------------|--------|---------|-----------|--------|------------------|--------|---------|-----------|--------|
|          | human                | mouse  | chicken | zebrafish | Ciona  | human            | mouse  | chicken | zebrafish | Ciona  |
| <b>A</b> | 0.0692               | 0.0692 | 0.0675  | 0.0647    | 0.0593 | 0.1227           | 0.1142 | 0.0848  | 0.0473    | 0.0226 |
| <b>F</b> | 0.0367               | 0.0367 | 0.0375  | 0.0373    | 0.0406 | 0.0038           | 0.0038 | 0.0043  | 0.0054    | 0.0063 |
| <b>L</b> | 0.0985               | 0.0988 | 0.0974  | 0.0966    | 0.0913 | 0.0410           | 0.0388 | 0.0306  | 0.0205    | 0.0122 |
| <b>I</b> | 0.0459               | 0.0448 | 0.0485  | 0.0468    | 0.0553 | 0.0036           | 0.0033 | 0.0046  | 0.0042    | 0.0097 |
| <b>M</b> | 0.0220               | 0.0222 | 0.0228  | 0.0244    | 0.0254 | 0.0042           | 0.0049 | 0.0062  | 0.0059    | 0.0093 |
| <b>V</b> | 0.0609               | 0.0619 | 0.0619  | 0.0634    | 0.0663 | 0.0151           | 0.0164 | 0.0122  | 0.0166    | 0.0120 |
| <b>S</b> | 0.0806               | 0.0815 | 0.0802  | 0.0830    | 0.0800 | 0.1381           | 0.1331 | 0.1450  | 0.1621    | 0.1378 |
| <b>P</b> | 0.0598               | 0.0591 | 0.0539  | 0.0535    | 0.0464 | 0.1543           | 0.1430 | 0.1227  | 0.0893    | 0.0906 |
| <b>T</b> | 0.0519               | 0.0523 | 0.0521  | 0.0541    | 0.0583 | 0.0214           | 0.0231 | 0.0198  | 0.0260    | 0.0666 |
| <b>Y</b> | 0.0274               | 0.0275 | 0.0291  | 0.0282    | 0.0311 | 0.0032           | 0.0039 | 0.0050  | 0.0057    | 0.0122 |
| <b>H</b> | 0.0254               | 0.0256 | 0.0252  | 0.0261    | 0.0260 | 0.0210           | 0.0194 | 0.0211  | 0.0342    | 0.0133 |
| <b>Q</b> | 0.0472               | 0.0474 | 0.0472  | 0.0473    | 0.0424 | 0.0894           | 0.1021 | 0.0819  | 0.0629    | 0.0863 |
| <b>N</b> | 0.0375               | 0.0366 | 0.0400  | 0.0393    | 0.0500 | 0.0042           | 0.0045 | 0.0060  | 0.0108    | 0.0330 |
| <b>K</b> | 0.0612               | 0.0606 | 0.0644  | 0.0608    | 0.0671 | 0.0394           | 0.0416 | 0.0695  | 0.0770    | 0.1211 |
| <b>D</b> | 0.0507               | 0.0512 | 0.0513  | 0.0536    | 0.0553 | 0.0399           | 0.0409 | 0.0540  | 0.0764    | 0.0628 |
| <b>E</b> | 0.0731               | 0.0727 | 0.0736  | 0.0711    | 0.0649 | 0.1282           | 0.1398 | 0.1580  | 0.1609    | 0.0820 |
| <b>C</b> | 0.0211               | 0.0213 | 0.0218  | 0.0218    | 0.0215 | 0.0014           | 0.0030 | 0.0019  | 0.0071    | 0.0005 |
| <b>W</b> | 0.0118               | 0.0117 | 0.0117  | 0.0115    | 0.0116 | 0.0005           | 0.0007 | 0.0011  | 0.0007    | 0.0007 |
| <b>R</b> | 0.0555               | 0.0560 | 0.0539  | 0.0558    | 0.0509 | 0.0432           | 0.0459 | 0.0675  | 0.0660    | 0.1046 |
| <b>G</b> | 0.0634               | 0.0630 | 0.0600  | 0.0606    | 0.0562 | 0.1254           | 0.1177 | 0.1038  | 0.1210    | 0.1166 |

**Table 6. Relative amino acid frequencies in complete proteins and in the LCR fraction.**

Complete proteins were from orthologous protein families (see main manuscript text). LCRs were identified using SEG parameters window=15,  $K_1=1.5$  and  $K_2=1.8$  in the same set of protein families.

Figure 1

A

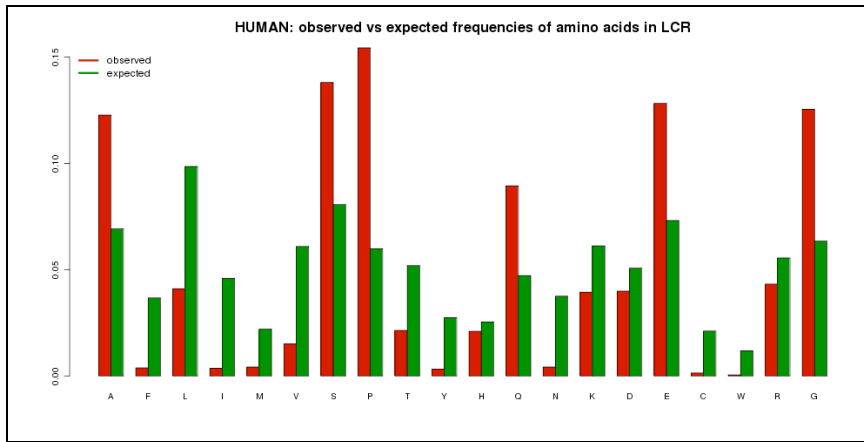

B

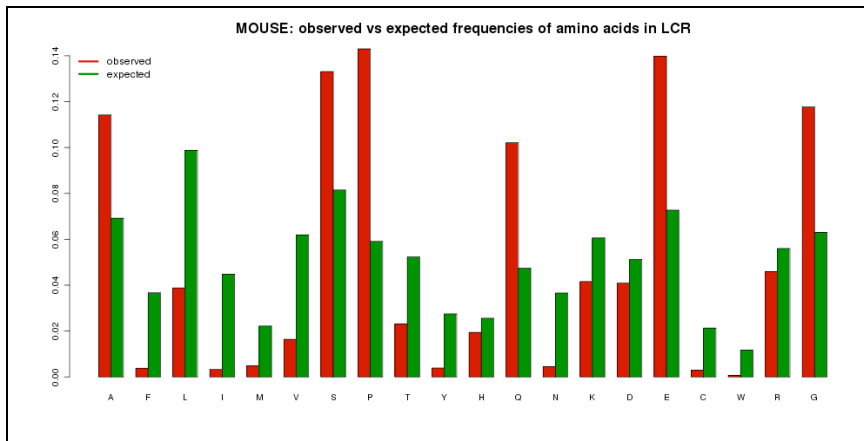

C

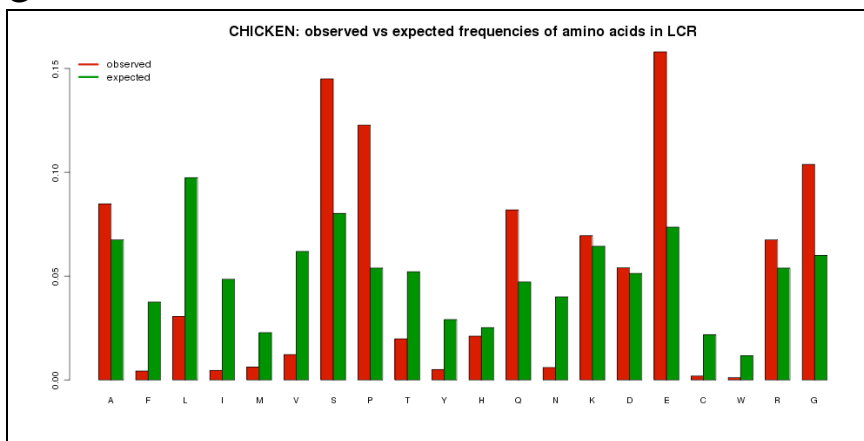



D

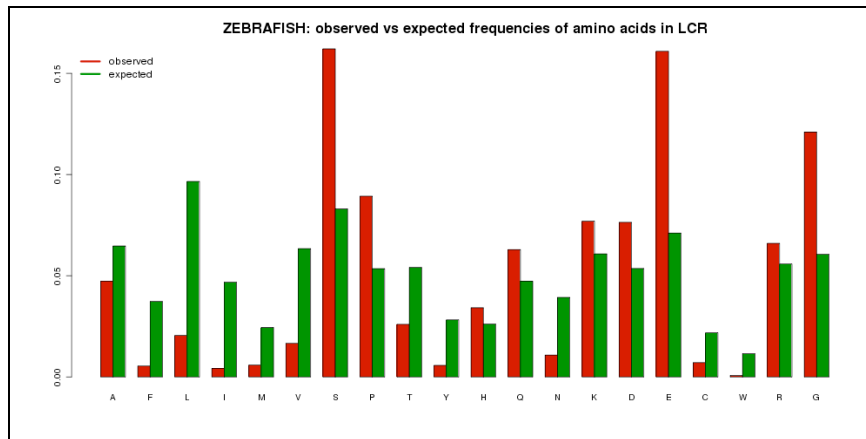

E

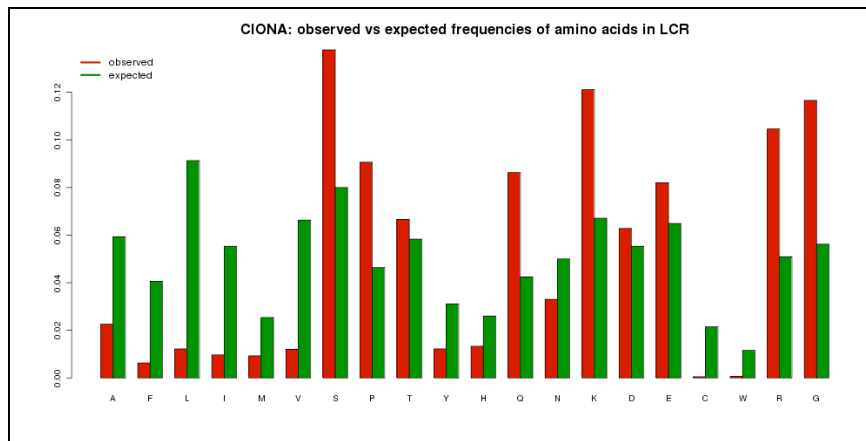

Figure 1. Histogram representation of the relative amino acid frequencies in complete proteins and in the LCR fraction. The data is from Table 6.
